# Supplementary material for: Identifying Human PTP1B Enzyme Inhibitors from Marine Natural Products: Perspectives for Developing of Novel Insulin-Mimetic Drugs
Source: MDPI journal article supplement (doi:10.3390/ph15030325), 2022-03-08
Supplement: s1 [file s1]

# Supplementary material

## Table of contents

|                                                                                                                        |    |
|------------------------------------------------------------------------------------------------------------------------|----|
| <b>Figure S1.</b> <sup>1</sup> H NMR spectrum in CD <sub>3</sub> OD (700 MHz) of compound <b>2</b>                     | 2  |
| <b>Figure S2.</b> HR-ESIMS spectrum of compound <b>2</b>                                                               | 2  |
| <b>Figure S3.</b> <sup>1</sup> H NMR spectrum in CD <sub>3</sub> OD (700 MHz) of compound <b>3</b>                     | 3  |
| <b>Figure S4.</b> HR-ESIMS spectrum of compound <b>3</b>                                                               | 3  |
| <b>Figure S5.</b> <sup>1</sup> H NMR spectrum in CD <sub>3</sub> OD (700 MHz) of compound <b>4a</b>                    | 4  |
| <b>Figure S6.</b> HR-ESIMS spectrum of compound <b>4a</b>                                                              | 4  |
| <b>Figure S7.</b> <sup>1</sup> H NMR spectrum in CD <sub>3</sub> OD (700 MHz) of compound <b>4b</b>                    | 5  |
| <b>Figure S8.</b> HR-ESIMS spectrum of compound <b>4b</b>                                                              | 5  |
| <b>Figure S9.</b> <sup>1</sup> H NMR spectrum in CD <sub>3</sub> OD (700 MHz) of compound <b>5a</b>                    | 6  |
| <b>Figure S10.</b> HR-ESIMS spectrum of compound <b>5a</b>                                                             | 6  |
| <b>Figure S11.</b> <sup>1</sup> H NMR spectrum in CD <sub>3</sub> OD (700 MHz) of compound <b>5b</b>                   | 7  |
| <b>Figure S12.</b> HR-ESIMS spectrum of compound <b>5b</b>                                                             | 7  |
| <b>Figure S13.</b> HR-ESIMS spectrum of compound <b>6a</b>                                                             | 8  |
| <b>Figure S14.</b> HR-ESIMS spectrum of compound <b>6b</b>                                                             | 8  |
| <b>Figure S15.</b> <sup>1</sup> H NMR spectrum in CD <sub>3</sub> OD (700 MHz) of compound <b>7a</b>                   | 9  |
| <b>Figure S16.</b> <sup>13</sup> C NMR spectrum in CD <sub>3</sub> OD (175 MHz) of compound <b>7a</b>                  | 9  |
| <b>Figure S17.</b> HR-ESIMS spectrum of compound <b>7a</b>                                                             | 10 |
| <b>Figure S18.</b> <sup>1</sup> H NMR spectrum in CD <sub>3</sub> OD (700 MHz) of compound <b>7b</b>                   | 10 |
| <b>Figure S19.</b> <sup>13</sup> C NMR spectrum in CD <sub>3</sub> OD (175 MHz) of compound <b>7b</b>                  | 11 |
| <b>Figure S20.</b> HR-ESIMS spectrum of compound <b>7b</b>                                                             | 11 |
| <b>Figure S21.</b> <sup>1</sup> H NMR spectrum in CD <sub>3</sub> OD (700 MHz) of compound <b>8a</b>                   | 12 |
| <b>Figure S22.</b> <sup>1</sup> H- <sup>1</sup> H COSY spectrum in CD <sub>3</sub> OD (700 MHz) of compound <b>8a</b>  | 12 |
| <b>Figure S23.</b> HR-ESIMS spectrum of compound <b>8a</b>                                                             | 13 |
| <b>Figure S24.</b> <sup>1</sup> H NMR spectrum in CD <sub>3</sub> OD (700 MHz) of compound <b>9a</b>                   | 13 |
| <b>Figure S25.</b> <sup>1</sup> H- <sup>1</sup> H COSY spectrum in CD <sub>3</sub> OD (700 MHz) of compound <b>9a</b>  | 14 |
| <b>Figure S26.</b> <sup>1</sup> H- <sup>13</sup> C HSQC spectrum in CD <sub>3</sub> OD (700 MHz) of compound <b>9a</b> | 14 |
| <b>Figure S27.</b> HR-ESIMS spectrum of compound <b>9a</b>                                                             | 15 |
| <b>Figure S28.</b> <sup>1</sup> H NMR spectrum in CD <sub>3</sub> OD (700 MHz) of compound <b>8b</b>                   | 15 |
| <b>Figure S29.</b> <sup>1</sup> H- <sup>1</sup> H COSY spectrum in CD <sub>3</sub> OD (700 MHz) of compound <b>8b</b>  | 16 |
| <b>Figure S30.</b> <sup>1</sup> H- <sup>13</sup> C HSQC spectrum in CD <sub>3</sub> OD (700 MHz) of compound <b>8b</b> | 16 |
| <b>Figure S31.</b> HR-ESIMS spectrum of compound <b>8b</b>                                                             | 17 |
| <b>Figure S32.</b> <sup>1</sup> H NMR spectrum in CD <sub>3</sub> OD (700 MHz) of compound <b>9b</b>                   | 17 |
| <b>Figure S33.</b> <sup>1</sup> H- <sup>1</sup> H COSY spectrum in CD <sub>3</sub> OD (700 MHz) of compound <b>9b</b>  | 18 |
| <b>Figure S34.</b> <sup>1</sup> H- <sup>1</sup> H TOCSY spectrum in CD <sub>3</sub> OD (700 MHz) of compound <b>9b</b> | 18 |
| <b>Figure S35.</b> <sup>1</sup> H- <sup>13</sup> C HSQC spectrum in CD <sub>3</sub> OD (700 MHz) of compound <b>9b</b> | 19 |
| <b>Figure S36.</b> HR-ESIMS spectrum of compound <b>9b</b>                                                             | 19 |
| <b>Table S1.</b> Effects of compounds <b>2</b> , <b>3</b> , <b>4a</b> , <b>4b</b> , and <b>8a-9b</b> on human AR       | 20 |

**Figure S1.**  $^1\text{H}$  NMR spectrum in  $\text{CD}_3\text{OD}$  (700 MHz) of compound **2**

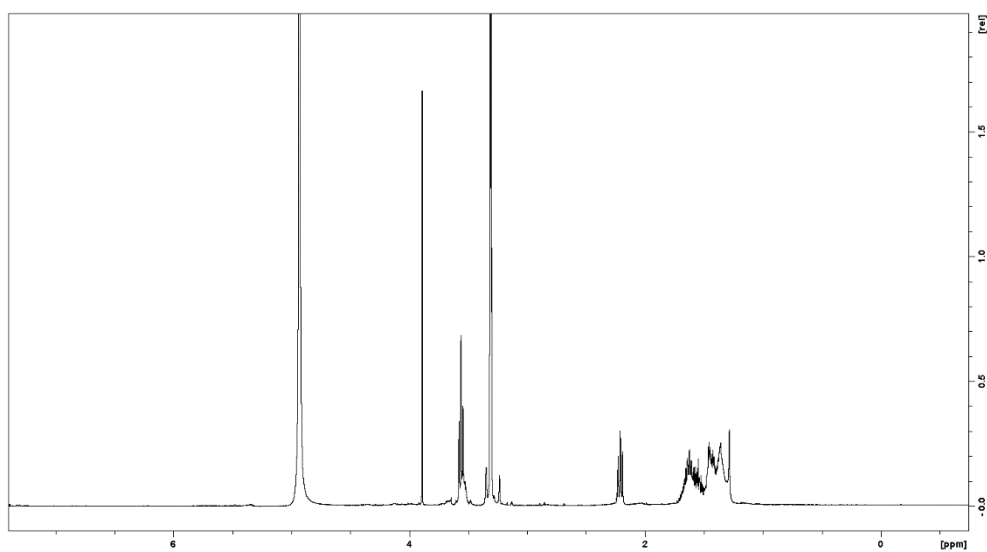

**Figure S2.** HR-ESIMS spectrum of compound **2**

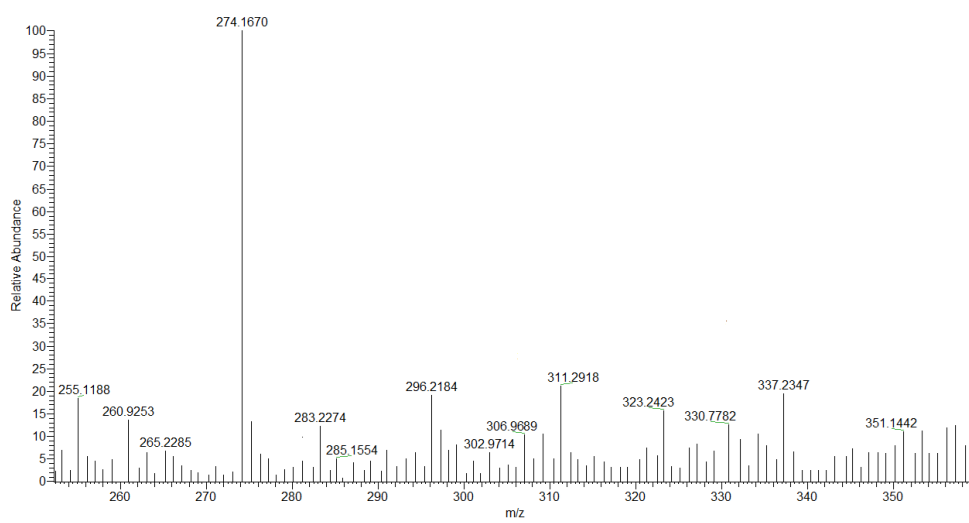

**Figure S3.**  $^1\text{H}$  NMR spectrum in  $\text{CD}_3\text{OD}$  (700 MHz) of compound **3**

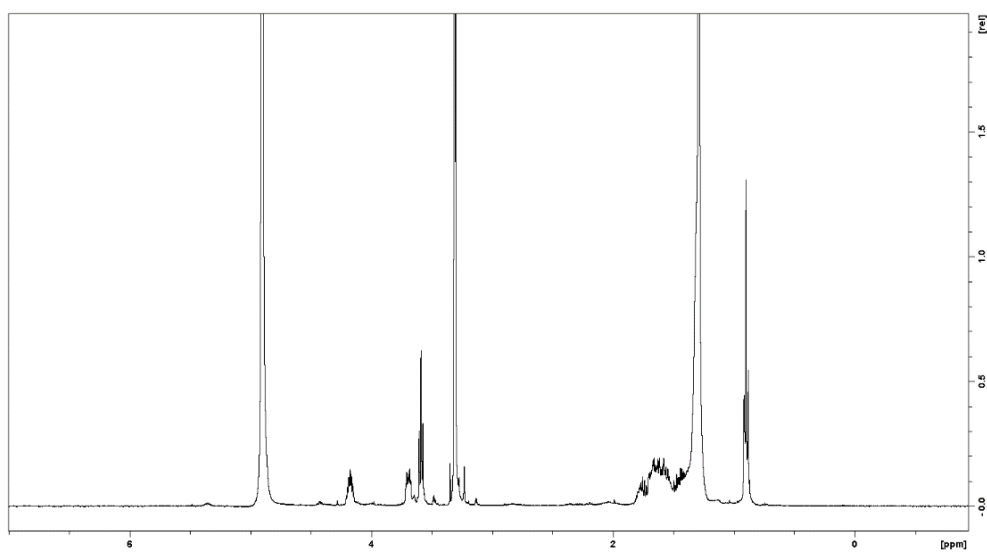

**Figure S4.** HR-ESIMS spectrum of compound **3**

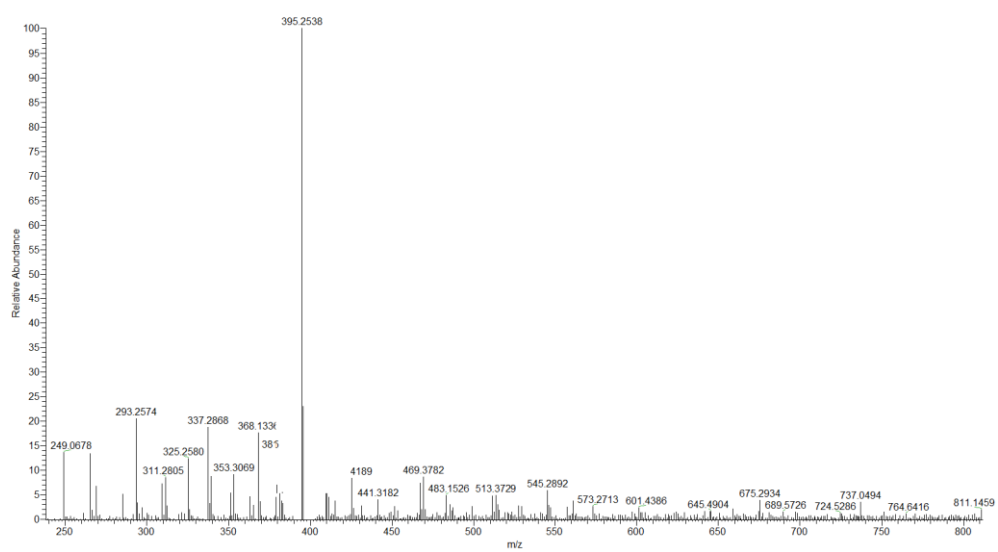

**Figure S5.**  $^1\text{H}$  NMR spectrum in  $\text{CD}_3\text{OD}$  (700 MHz) of compound **4a**

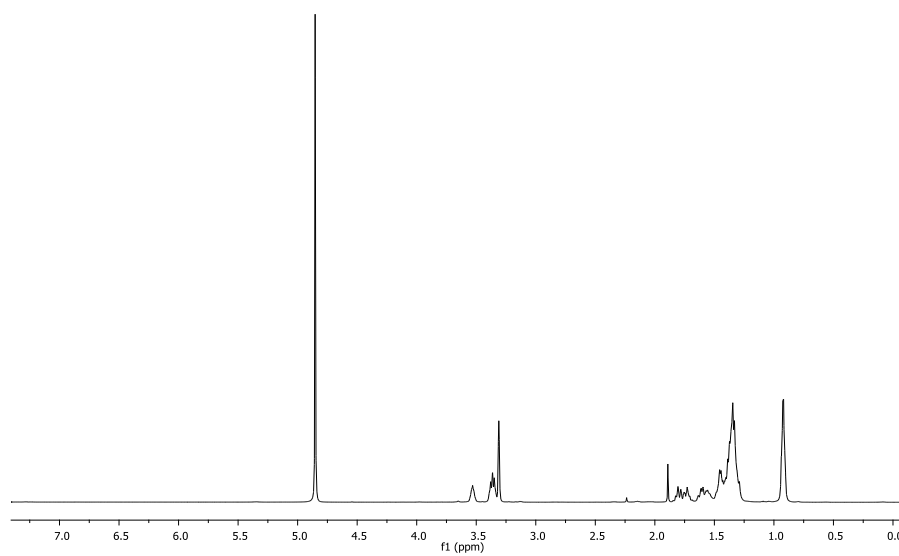

**Figure S6.** HR-ESIMS spectrum of compound **4a**

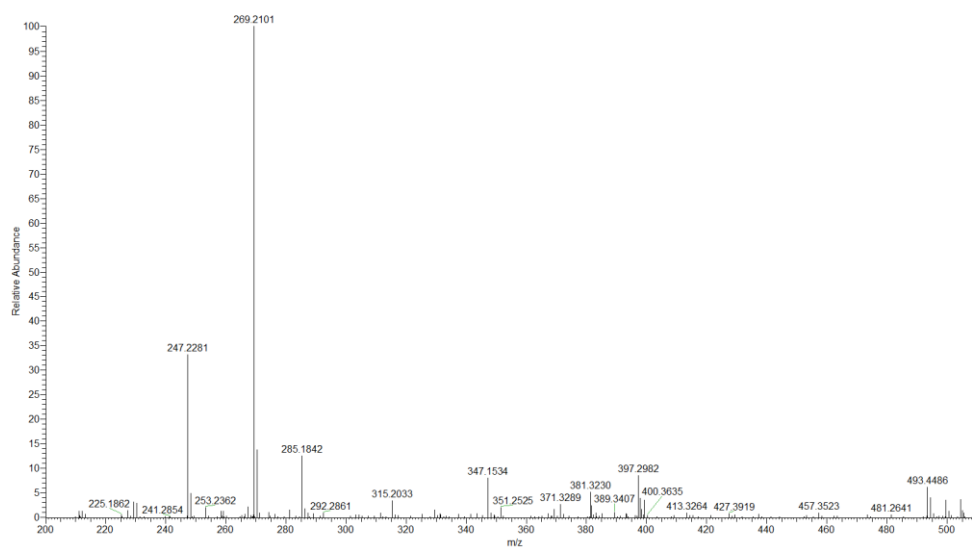

**Figure S7.**  $^1\text{H}$  NMR spectrum in  $\text{CD}_3\text{OD}$  (700 MHz) of compound **4b**

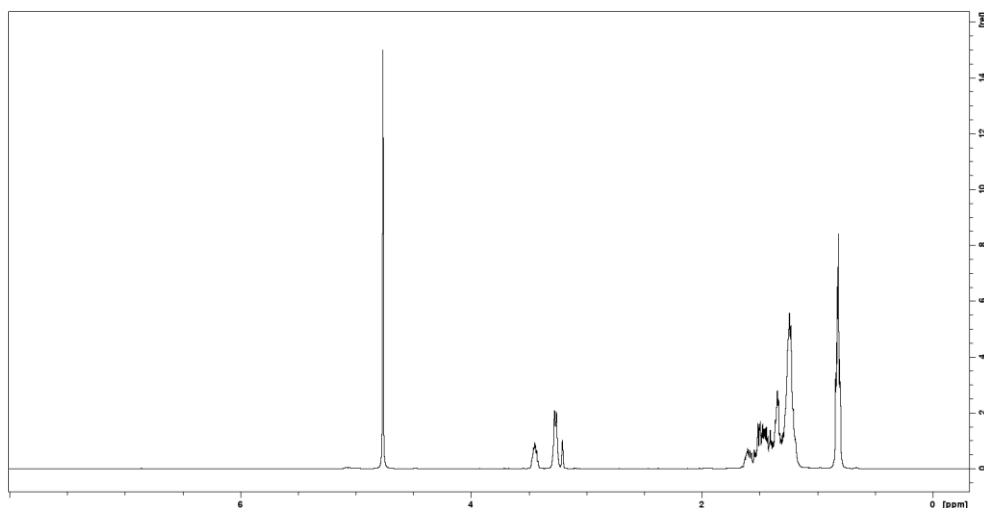

**Figure S8.** HR-ESIMS spectrum of compound **4b**

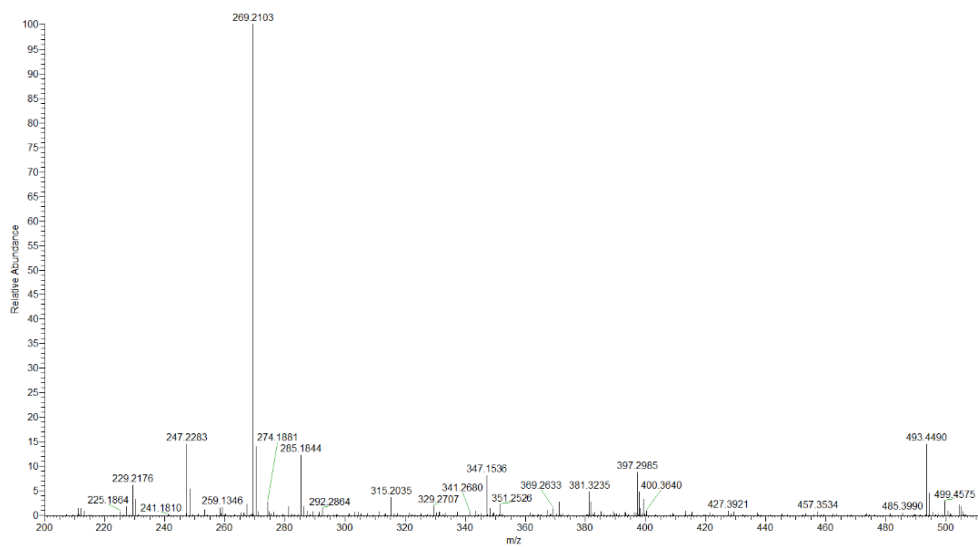

**Figure S9.**  $^1\text{H}$  NMR spectrum in  $\text{CD}_3\text{OD}$  (700 MHz) of compound **5a**

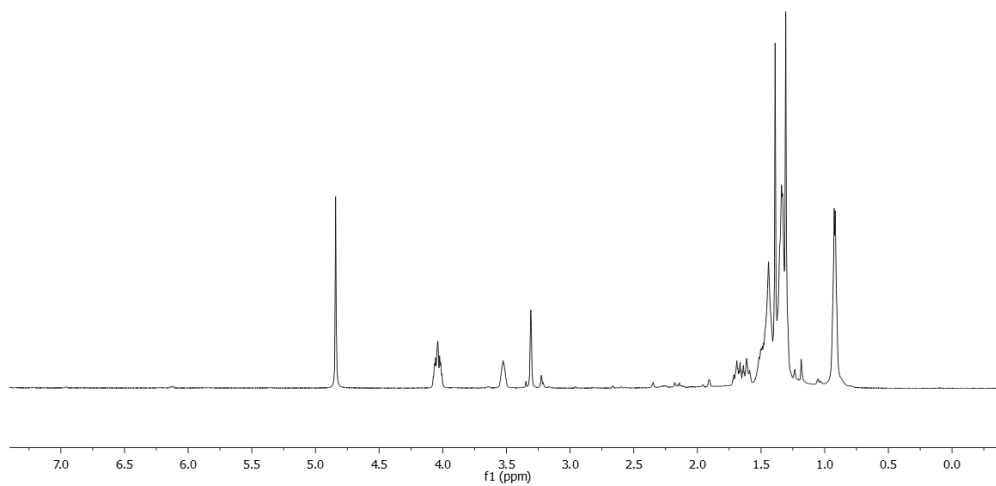

**Figure S10.** HR-ESIMS spectrum of compound **5a**

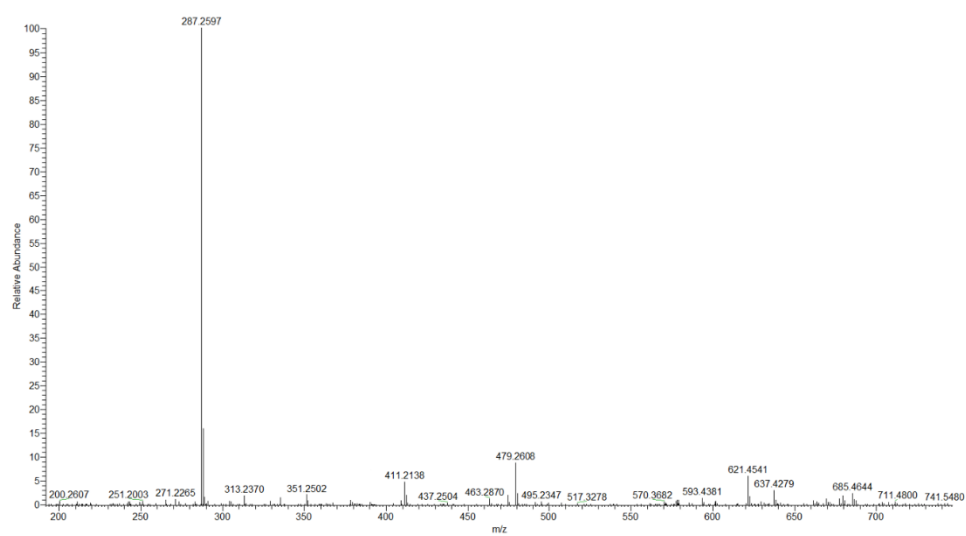

**Figure S11.**  $^1\text{H}$  NMR spectrum in  $\text{CD}_3\text{OD}$  (700 MHz) of compound **5b**

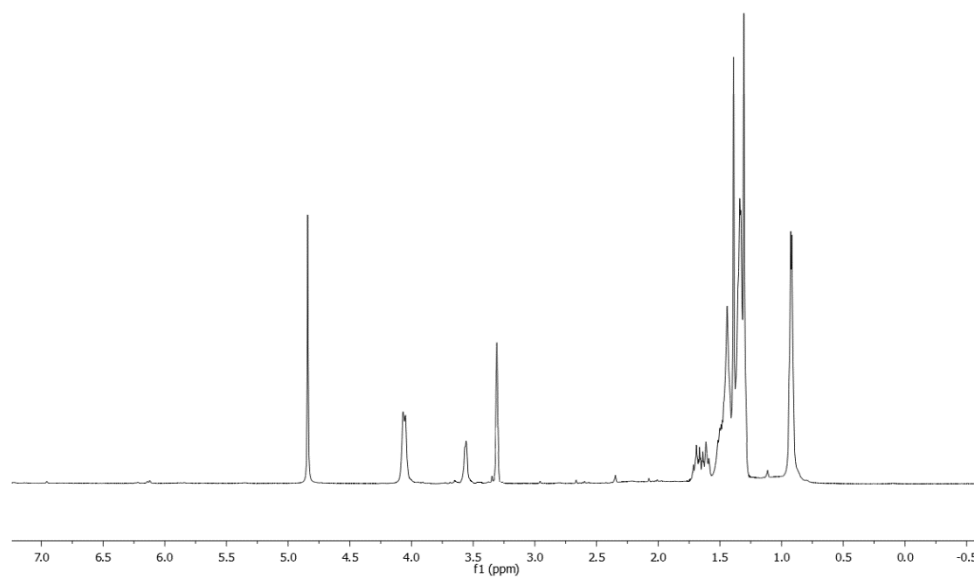

**Figure S12.** HR-ESIMS spectrum of compound **5b**

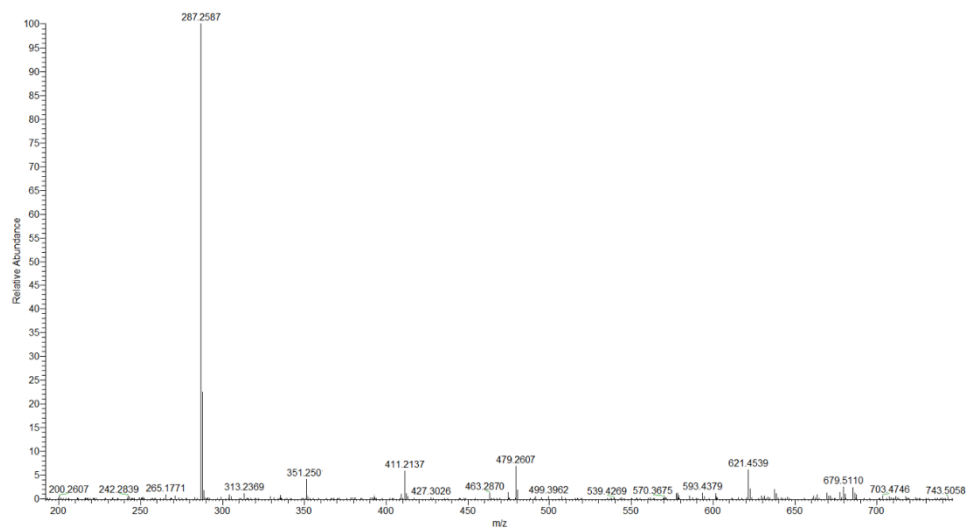

**Figure S13.**HR-ESIMS spectrum of compound **6a**

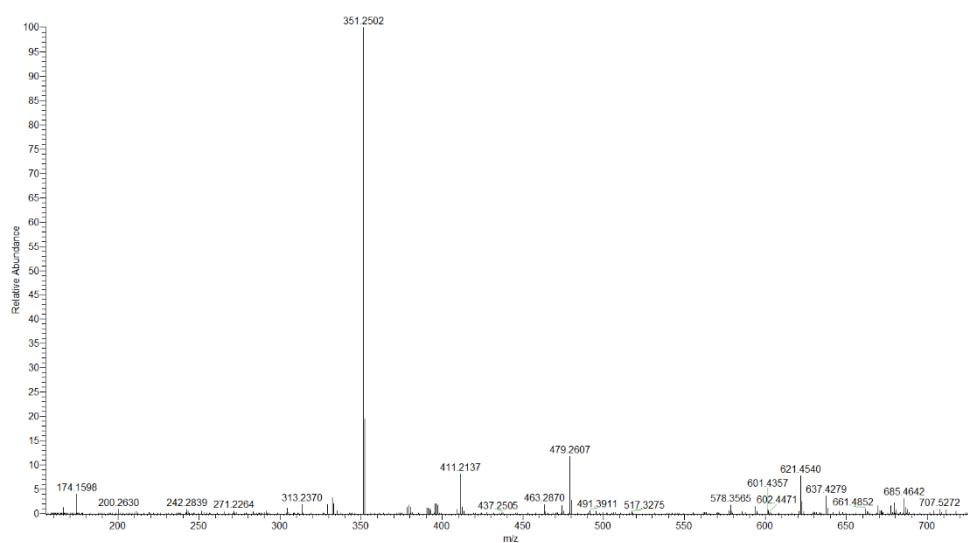

**Figure S14.**HR-ESIMS spectrum of compound **6b**

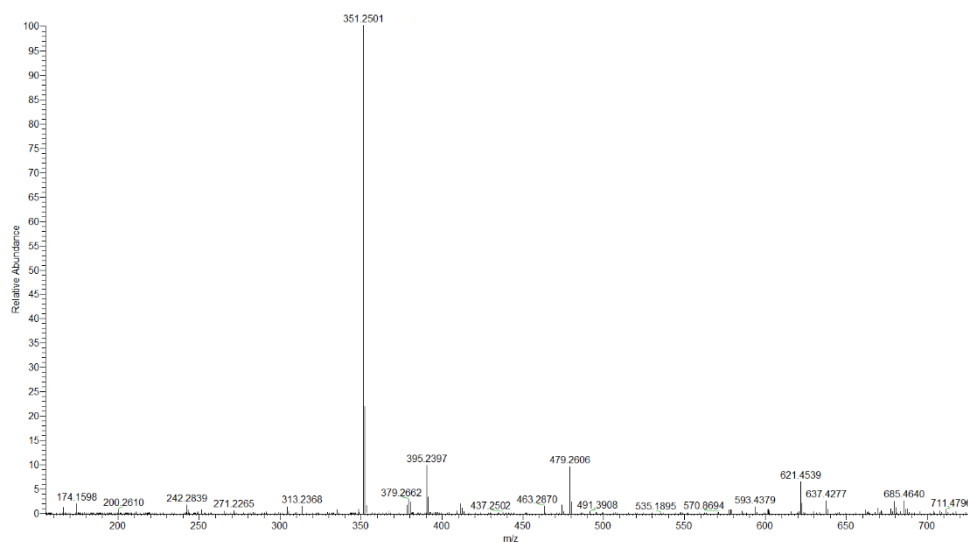



**Figure S15.**  $^1\text{H}$  NMR spectrum in  $\text{CD}_3\text{OD}$  (700 MHz) of compound **7a**

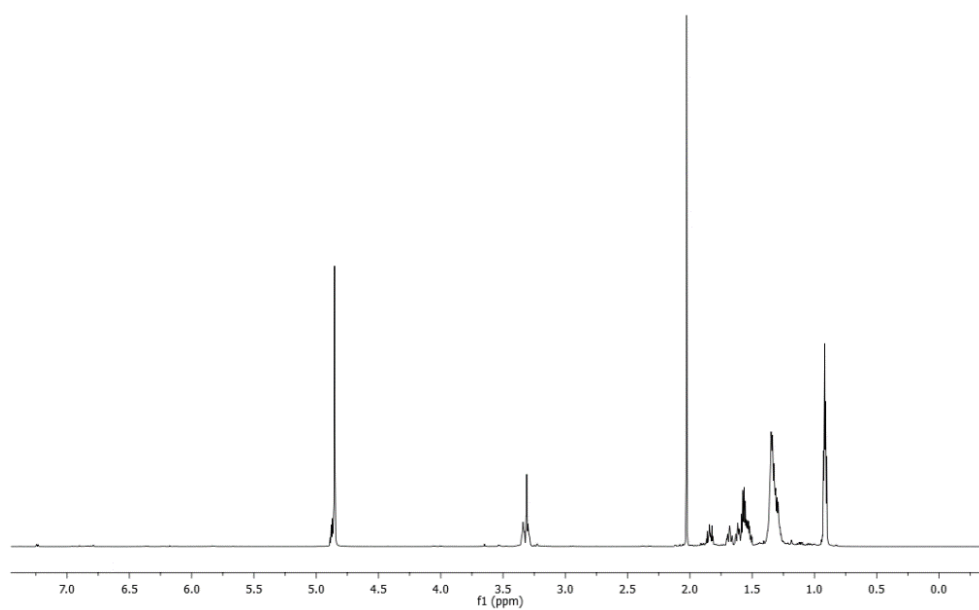

**Figure S16.**  $^{13}\text{C}$  NMR spectrum in  $\text{CD}_3\text{OD}$  (175 MHz) of compound **7a**

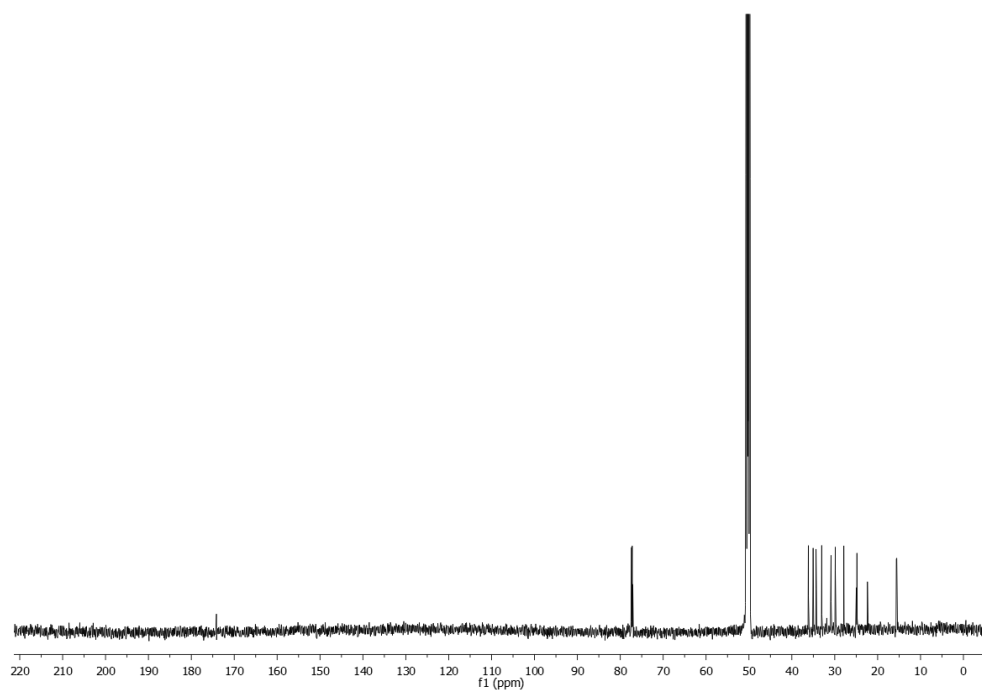

**Figure S17.**HR-ESIMS spectrum of compound **7a**

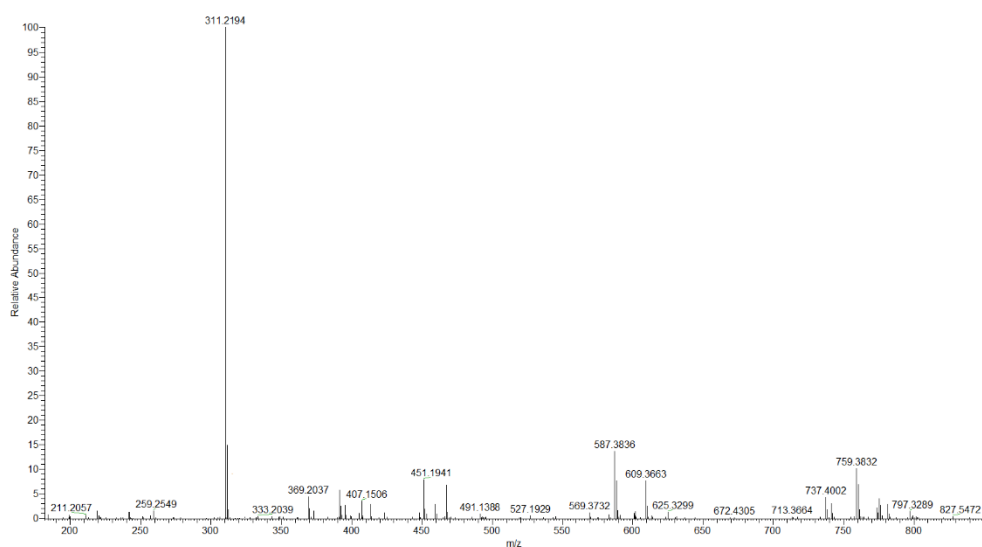

**Figure S18.** $^1\text{H}$  NMR spectrum in  $\text{CD}_3\text{OD}$  (700 MHz) of compound **7b**

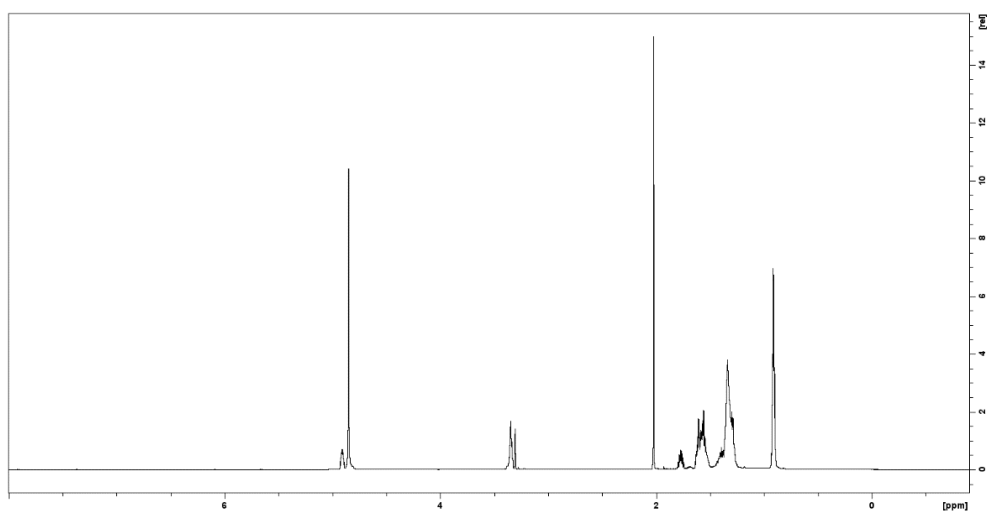

**Figure S19.**  $^{13}\text{C}$  NMR spectrum in  $\text{CD}_3\text{OD}$  (175 MHz) of compound **7b**

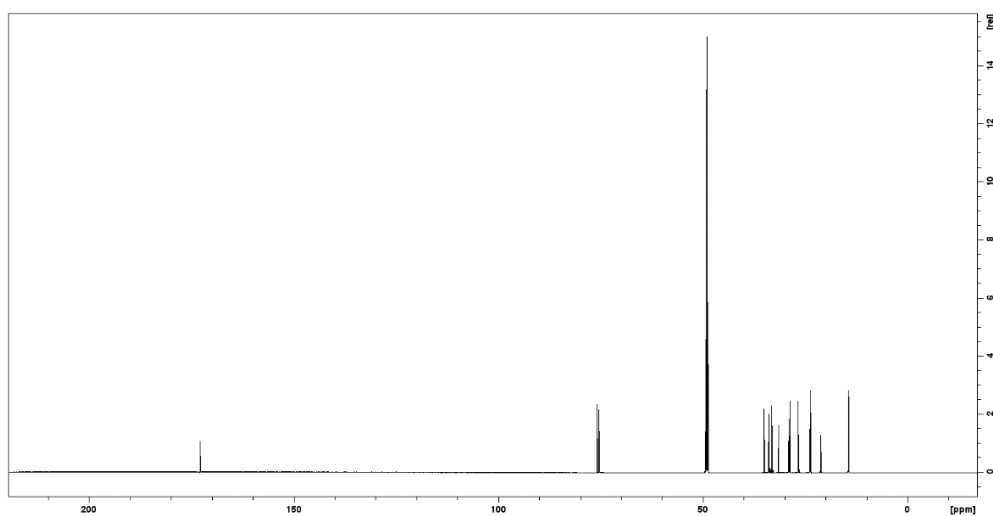

**Figure S20.** HR-ESIMS spectrum of compound **7b**

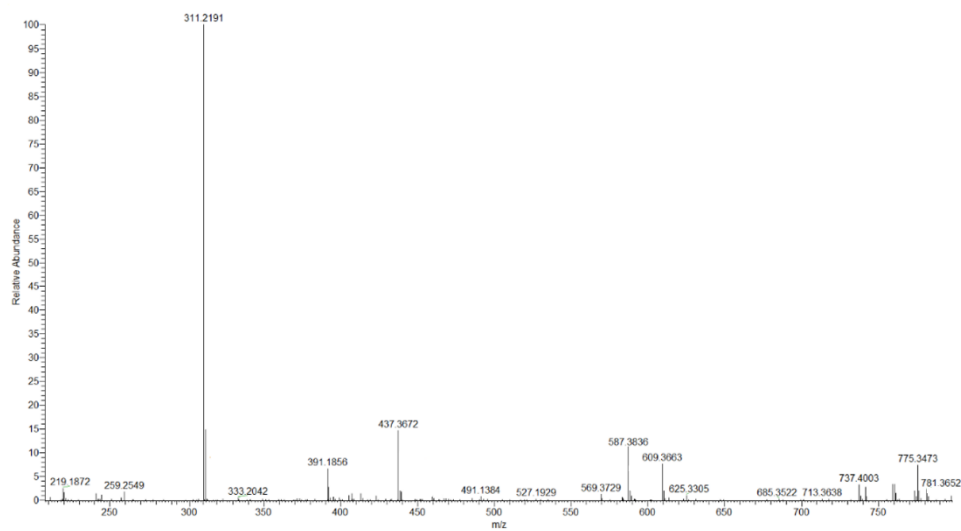

**Figure S21.**  $^1\text{H}$  NMR spectrum in  $\text{CD}_3\text{OD}$  (700 MHz) of compound **8a**

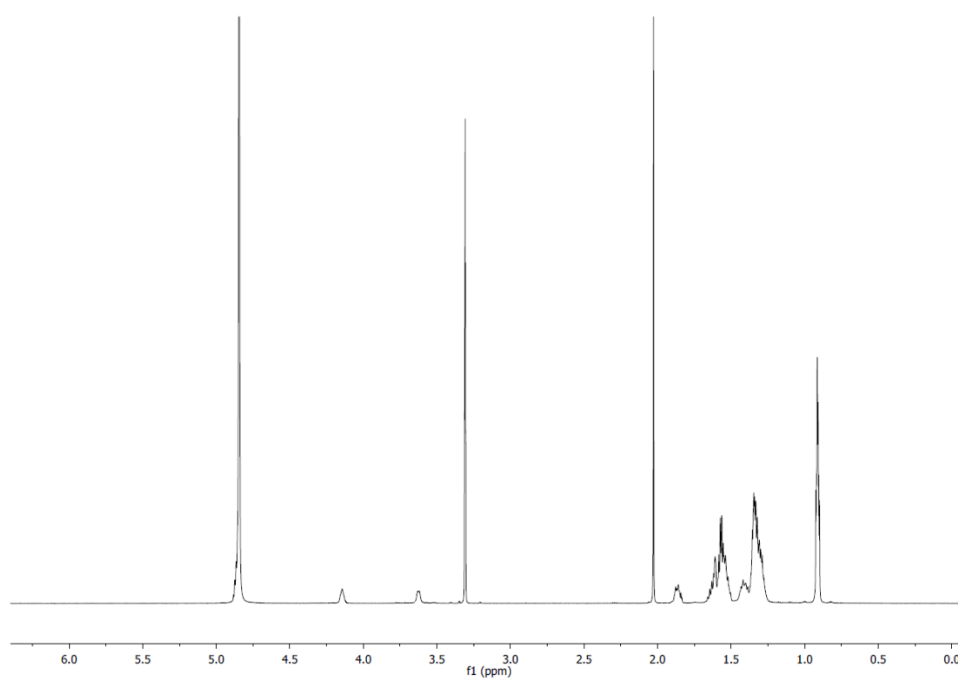

**Figure S22.**  $^1\text{H}$ - $^1\text{H}$  COSY spectrum in  $\text{CD}_3\text{OD}$  (700 MHz) of compound **8a**

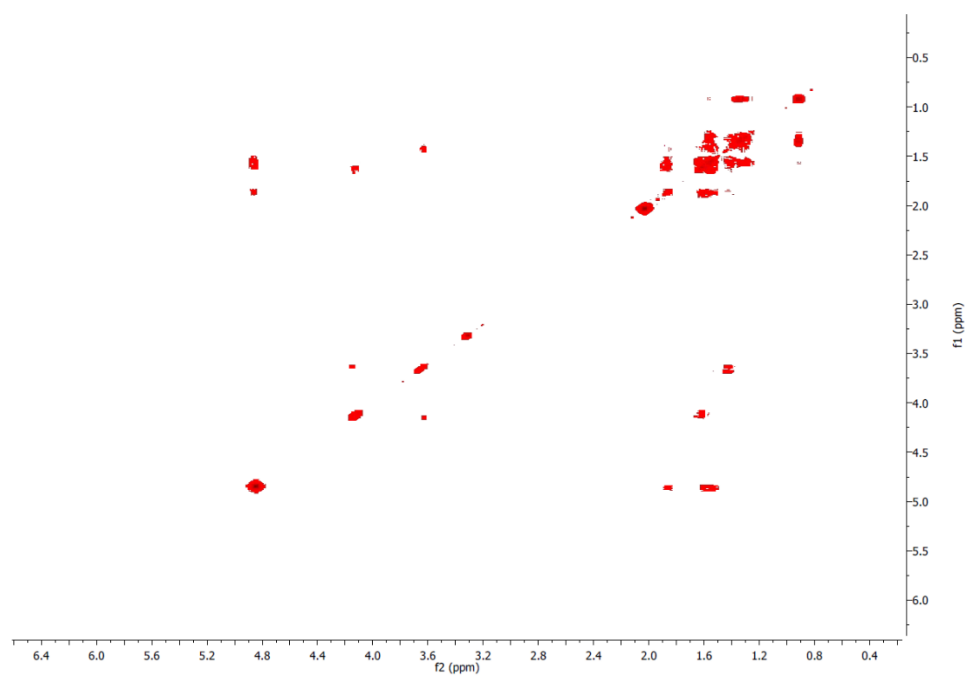

**Figure S23.**HR-ESIMS spectrum of compound **8a**

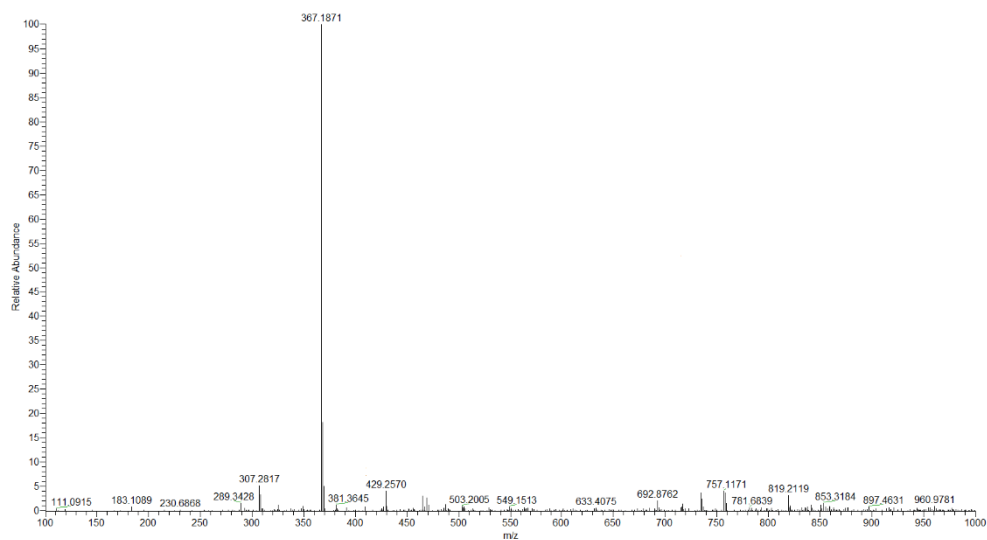

**Figure S24.** $^1\text{H}$  NMR spectrum in  $\text{CD}_3\text{OD}$  (700 MHz) of compound **9a**

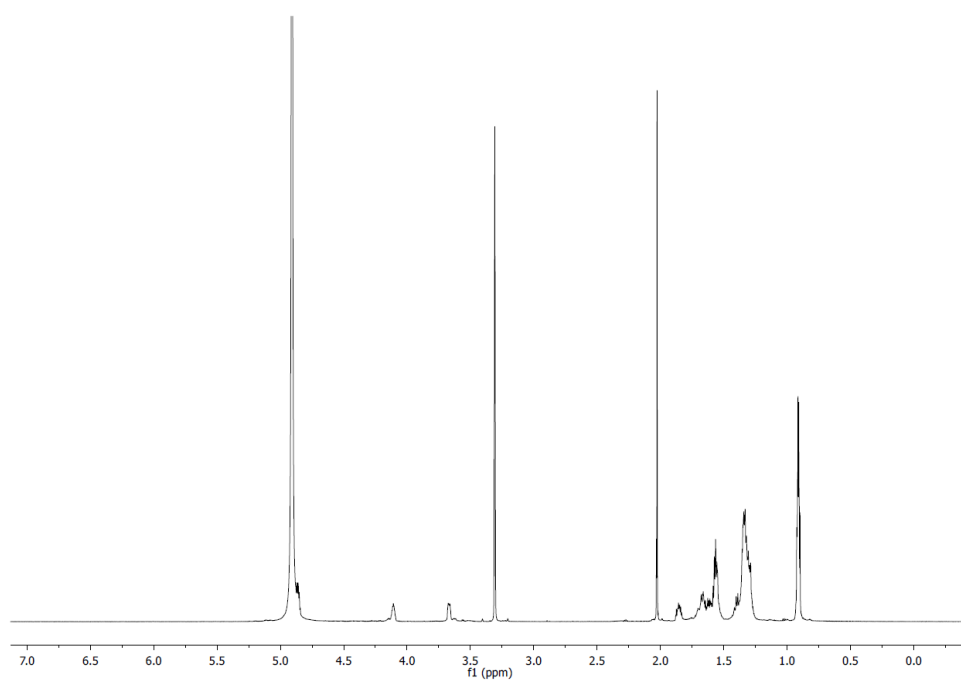

**Figure S25.**  $^1\text{H}$ - $^1\text{H}$  COSY spectrum in  $\text{CD}_3\text{OD}$  (700 MHz) of compound **9a**

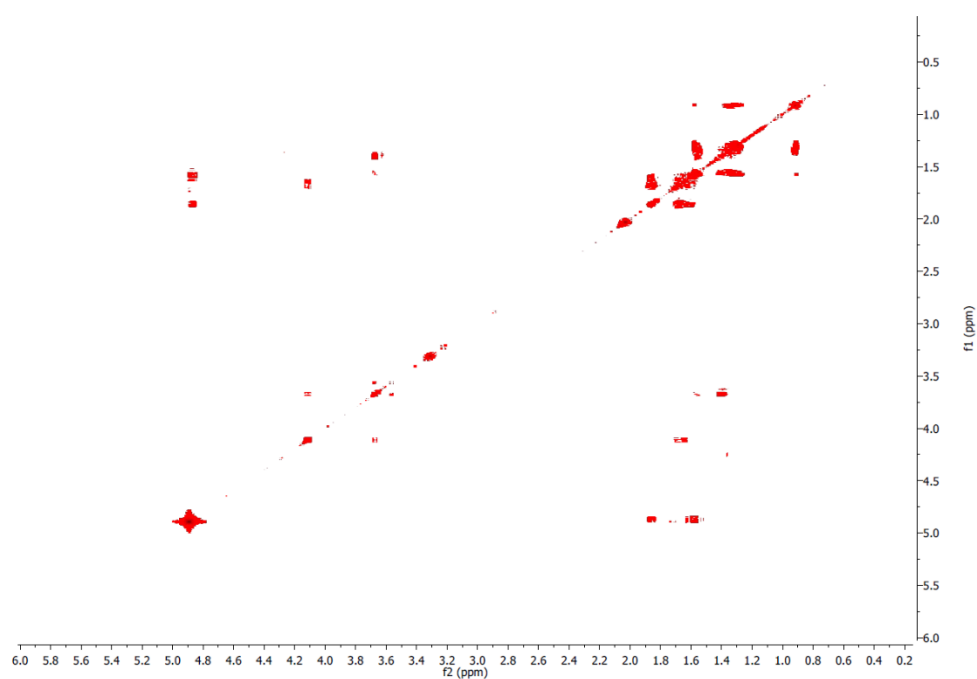

**Figure S26.**  $^1\text{H}$ - $^{13}\text{C}$  HSQC spectrum in  $\text{CD}_3\text{OD}$  (700 MHz) of compound **9a**

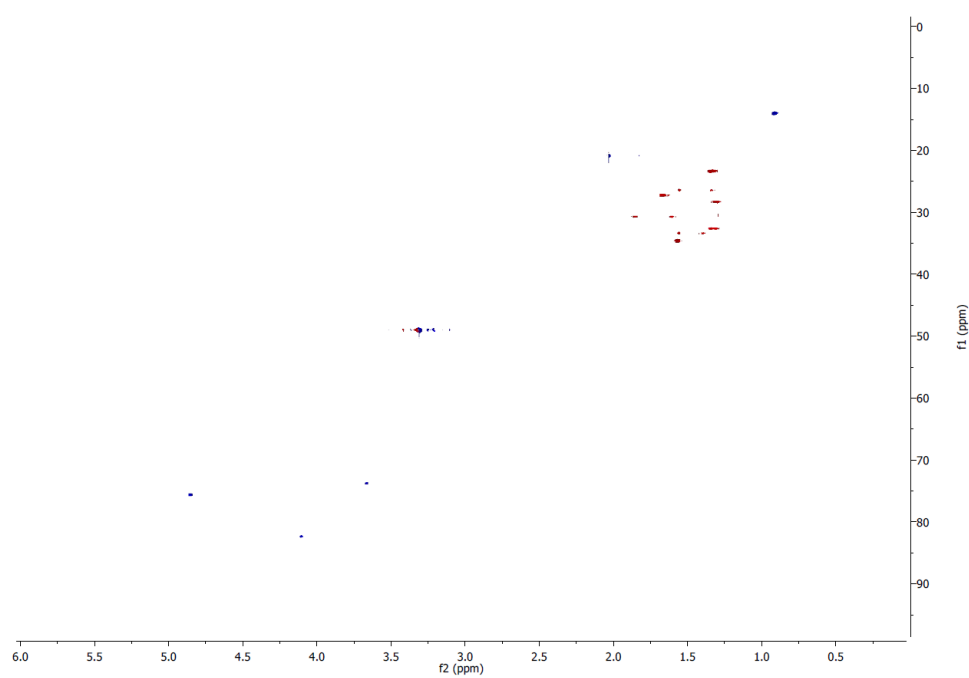

**Figure S27.**HR-ESIMS spectrum of compound **9a**

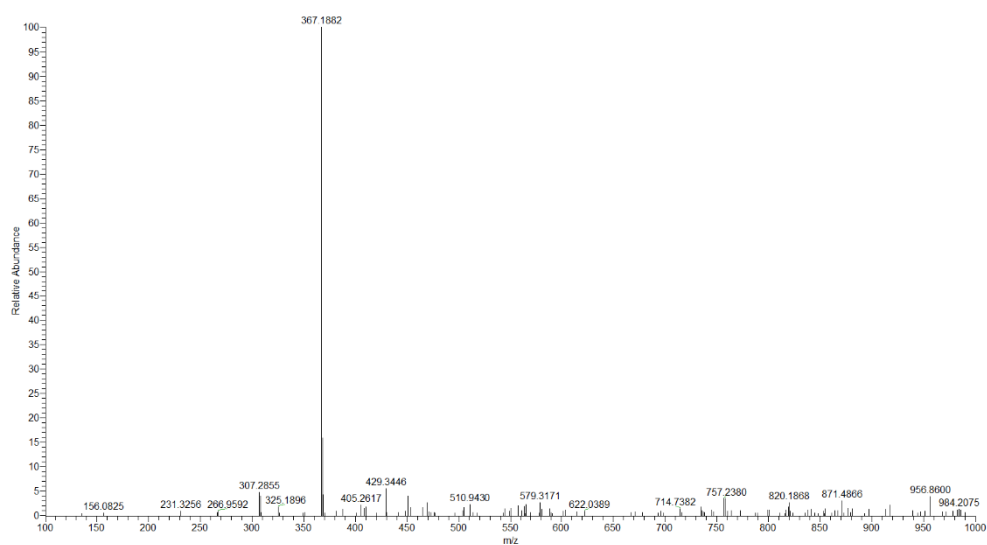

**Figure S28.** $^1\text{H}$  NMR spectrum in  $\text{CD}_3\text{OD}$  (700 MHz) of compound **8b**

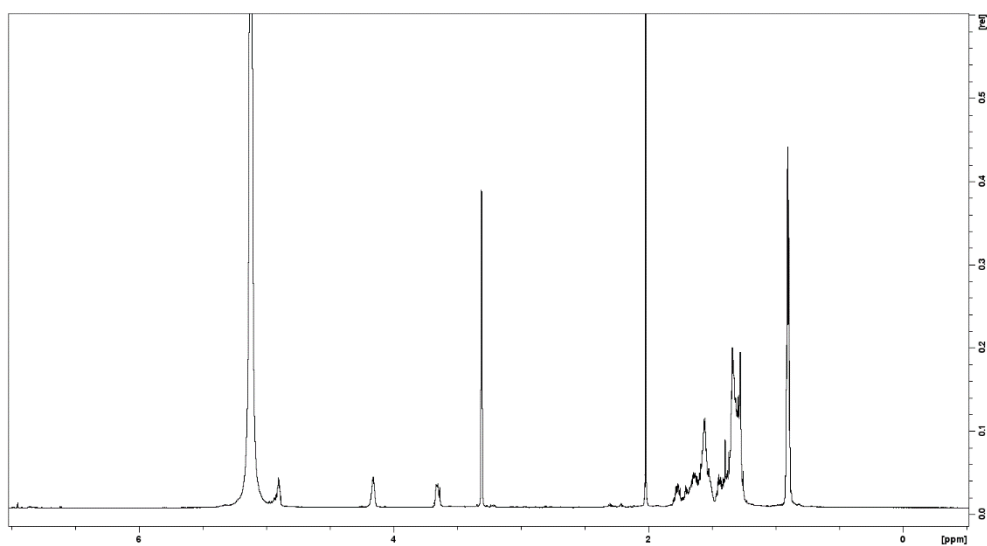

**Figure S29.**  $^1\text{H}$ - $^1\text{H}$  COSY spectrum in  $\text{CD}_3\text{OD}$  (700 MHz) of compound **8b**

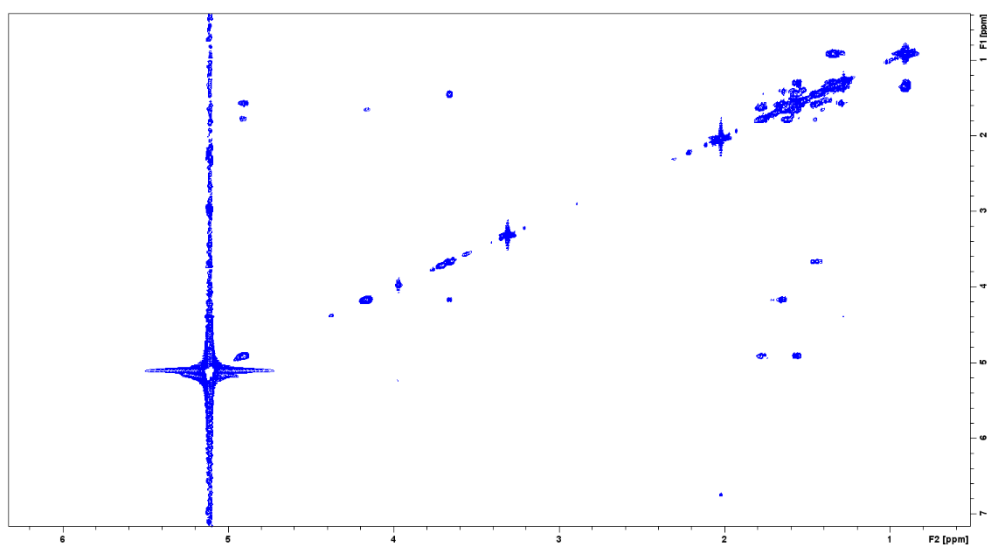

**Figure S30.**  $^1\text{H}$ - $^{13}\text{C}$  HSQC spectrum in  $\text{CD}_3\text{OD}$  (700 MHz) of compound **8b**

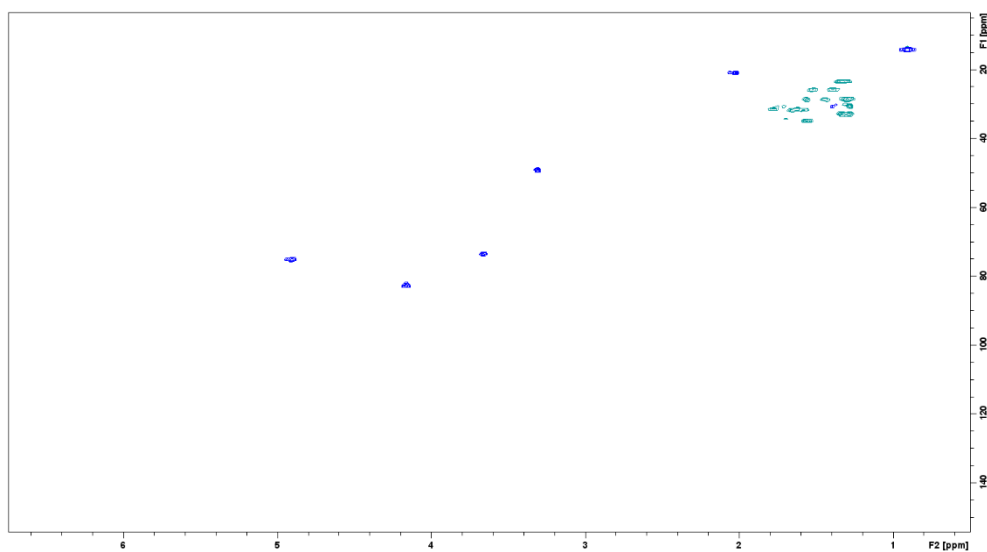



**Figure S31.**HR-ESIMS spectrum of compound **8b**

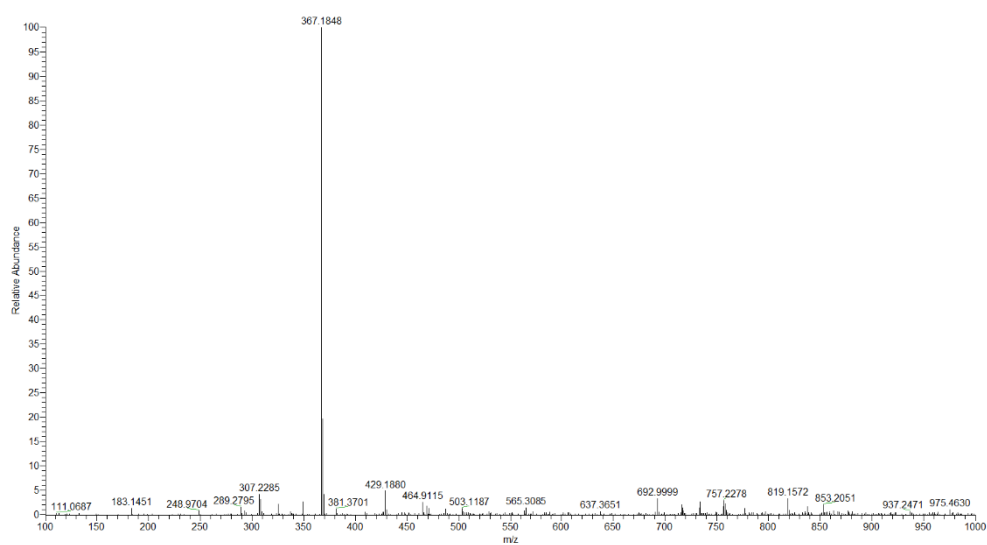

**Figure S32.** $^1\text{H}$  NMR spectrum in  $\text{CD}_3\text{OD}$  (700 MHz) of compound **9b**

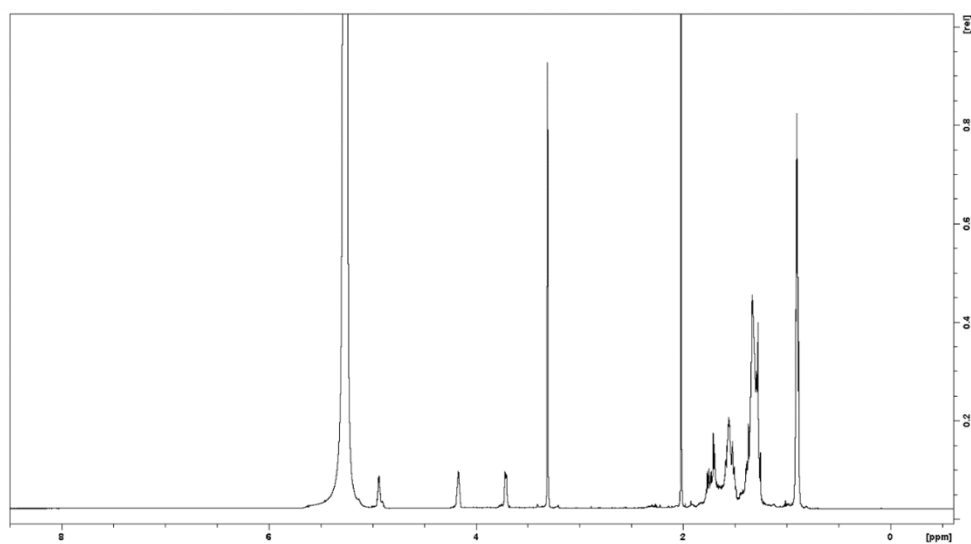

**Figure S33.**  $^1\text{H}$ - $^1\text{H}$  COSY spectrum in  $\text{CD}_3\text{OD}$  (700 MHz) of compound **9b**

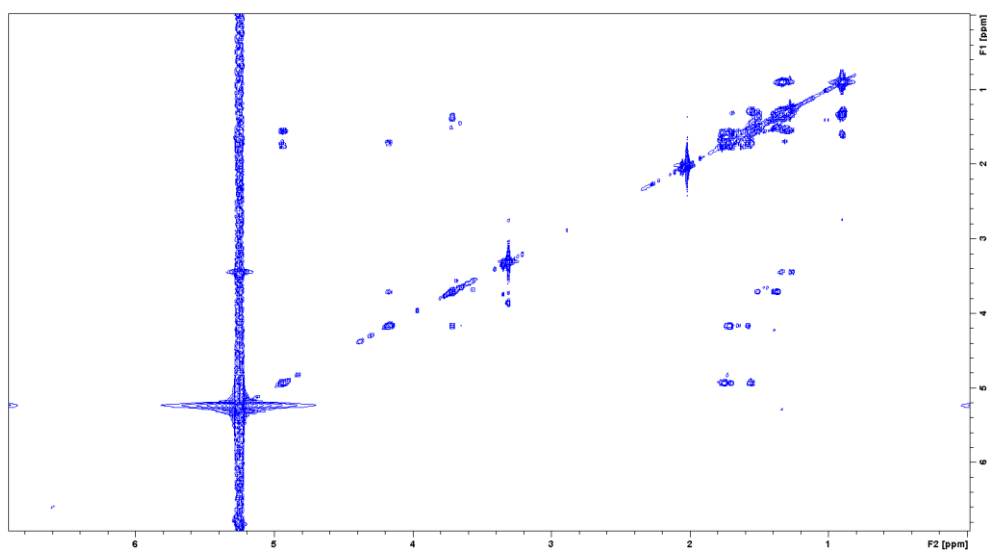

**Figure S34.**  $^1\text{H}$ - $^1\text{H}$  TOCSY spectrum in  $\text{CD}_3\text{OD}$  (700 MHz) of compound **9b**

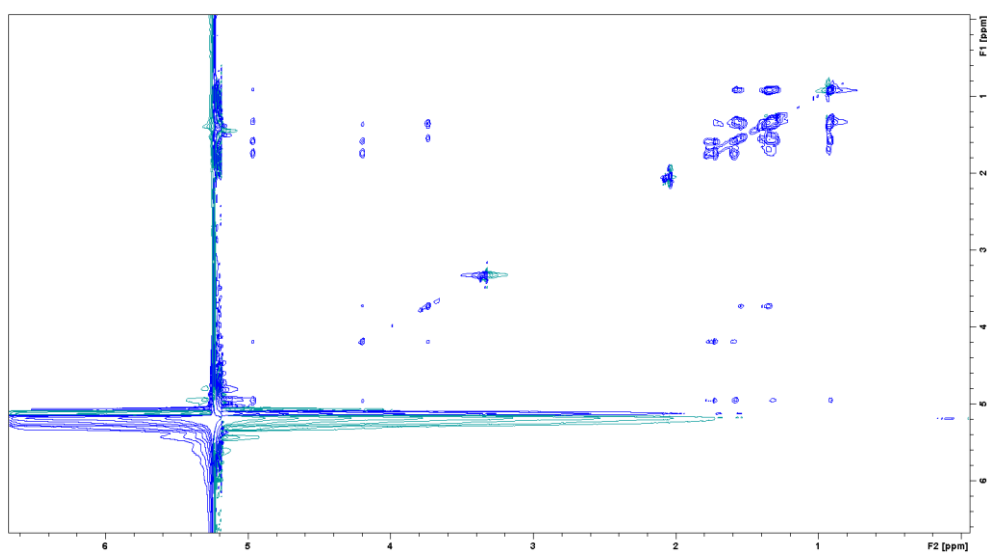

**Figure S35.**  $^1\text{H}$ - $^{13}\text{C}$  HSQC spectrum in  $\text{CD}_3\text{OD}$  (700 MHz) of compound **9b**

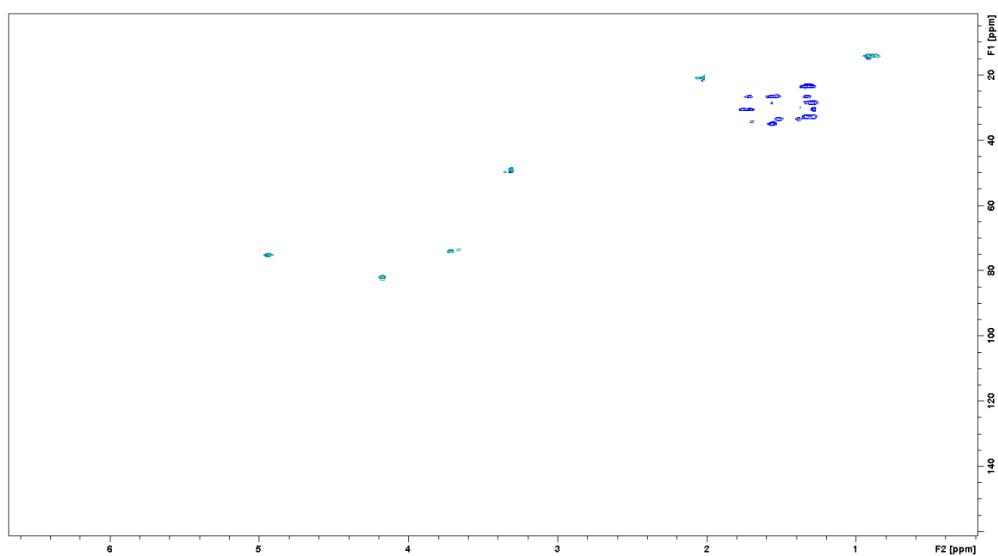

**Figure S36.** HR-ESIMS spectrum of compound **9b**

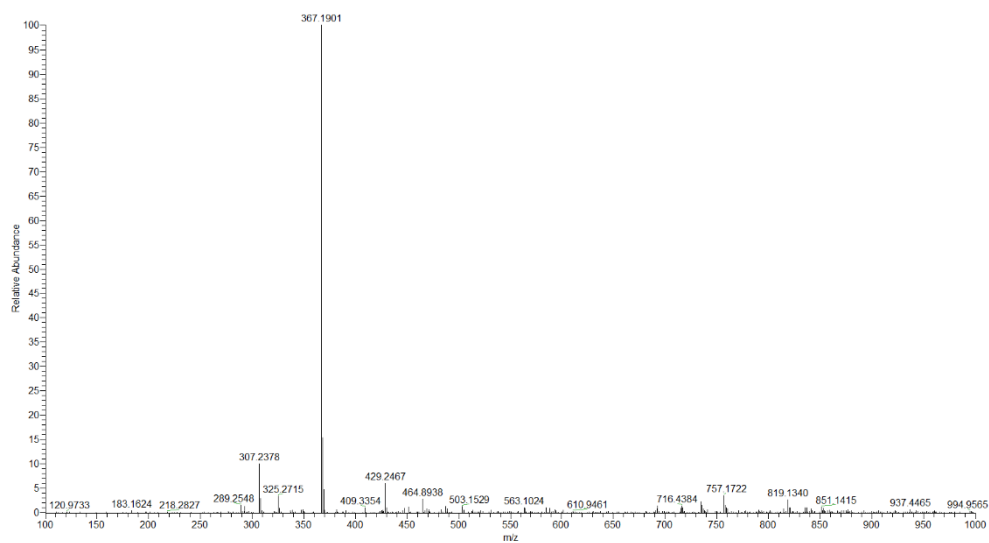

**Table S1.** Effects of compounds **2**, **3**, **4a**, **4b**, and **8a-9b** on human AR

| Compound  | % residual activity <sup>a</sup> |
|-----------|----------------------------------|
| <b>2</b>  | 103 ± 4 (71 μM)                  |
| <b>3</b>  | 82 ± 3 (71 μM)                   |
| <b>4a</b> | 97 ± 4 (43 μM)                   |
| <b>4b</b> | 98 ± 3 (43 μM)                   |
| <b>8a</b> | 87 ± 2 (71 μM)                   |
| <b>8b</b> | 74 ± 8 (210 μM)                  |
| <b>9a</b> | 86 ± 2 (107 μM)                  |
| <b>9b</b> | 74 ± 6 (210 μM)                  |

The residual activity is reported as the mean ± SD of at least three independent measurements. <sup>a</sup>The maximal concentration of the compound used to evaluate residual activity is reported in parenthesis.
